# Supplementary material
Source: PubMed Central journal article supplement (PMC3842574)
Supplement: 97320630009896S1.pdf [file 97320630009896S1.pdf]

## Supplementary material:

**Table 1:** Oligonucleotide primers and TaqMan probes used in the duplex real-time PCR assay for *femB* and *mecA* genes in MRSA.

| Oligonucleotide | Sequence (5'-3')                   |
|-----------------|------------------------------------|
| <b>femVIC</b>   | TCATCAGTICAAGGAATCGACTTTAACACCATAG |
| <b>femB1</b>    | GACATTGATAGTCAACGTAAACGTAATAT      |
| <b>femB2</b>    | GCTCTTCAGTTTCACGATATAAATCTAAGA     |
| <b>MecFAM</b>   | TTCCAGGAATGCAGAAAGACCAAAGCA        |
| <b>MecA1</b>    | AGTTAGATTGGGATCATAGCGTCAT          |
| <b>MecA2</b>    | TGGCCAATTCACATTGTTTC               |

**Table 2:** Duplex PCR amplification for the *mecA* and *femB* genes from 100 MRSA strains and 35 strains of other bacterial genera

| Phenotype of strains† | <i>fem B</i> |        | <i>mecA</i> |        |
|-----------------------|--------------|--------|-------------|--------|
|                       | Expected     | Actual | Expected    | Actual |
| 99 MRSA               | +            | +      | +           | +      |
| 1 MRSA‡               | +            | +      | +           | -      |
| 10 MSSA               | +            | +      | -           | -      |
| 5 MRSE                | -            | -      | +           | +      |
| 5 MSSE                | -            | -      | -           | -      |
| 15 others             | -            | -      | -           | -      |

**Keys:** +, Positive; -, Negative; †, As provided by staff at the MRI Clinical Bacteriology Laboratory; ‡, Unexpected results
